# Supplementary material for: Precise regulation of tilt angle of Si nanostructures via metal-assisted chemical etching
Source: Royal Society of Chemistry journal article supplement (doi:10.1039/c6nr08384f), 2016-11-29
Supplement: c6nr08384f1.pdf [file c6nr08384f1.pdf]

## Supporting Information

### Precise Regulation of Tilt Angle of Si Nanostructures by Metal-assisted Chemical Etching

Fei Teng, Ning Li, Daren Xu, Dongyang Xiao, Xiangchao Yang, Nan Lu\*

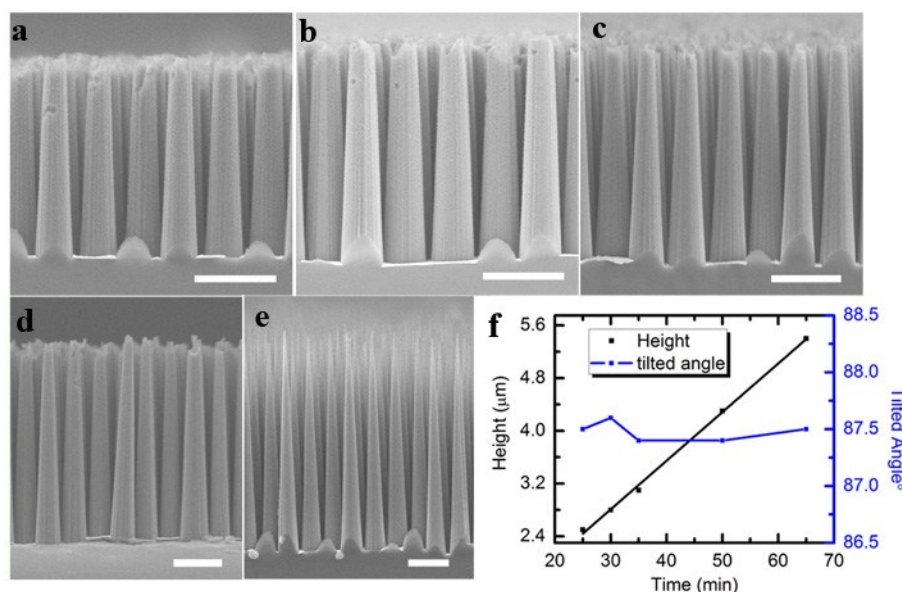

**Figure S1.** SEM images of Si nanocone arrays fabricated by etching for (a) 25 min, (b) 30 min, (c) 35 min, (d) 50 min and (e) 65 min, respectively. (f) The correlation of the etching duration and the tilted angle as well as the height of nanocones. Scale bars in Figure S1a to e are 1 μm. The volume ratio of HF, H<sub>2</sub>O<sub>2</sub>, and C<sub>2</sub>H<sub>5</sub>OH in etchant is 3:1:20.

**Table S1.** Composition of etchant and etching duration for the fabrication of nanocones shown in Figure 3.

| Sample | HF(mL) | H <sub>2</sub> O <sub>2</sub> (mL) | C <sub>2</sub> H <sub>5</sub> OH (mL) | Time (min) |
|--------|--------|------------------------------------|---------------------------------------|------------|
| a      | 3.35   | 0.65                               | 20                                    | 110        |
| b      | 3      | 1                                  | 20                                    | 42         |
| c      | 2.75   | 1.25                               | 20                                    | 30         |
| d      | 2.5    | 1.5                                | 20                                    | 30         |
| e      | 2.25   | 1.75                               | 20                                    | 40         |
| f      | 2      | 2                                  | 20                                    | 30         |

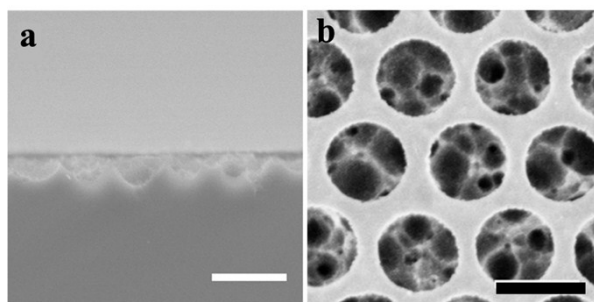

**Figure S2.** (a) Side-view and (b) top-view SEM images of rough nanotips. Scale bars represent 500 nm

**Table S2.** Composition of etchant and etching duration for the fabrication of nanocones shown in Figure 4.

| Sample | HF(mL) | H <sub>2</sub> O <sub>2</sub> (mL) | C <sub>2</sub> H <sub>5</sub> OH (mL) | Time (min) |
|--------|--------|------------------------------------|---------------------------------------|------------|
| a      | 3      | 1                                  | 15                                    | 65         |
| b      | 3      | 1                                  | 25                                    | 65         |
| c      | 3      | 1                                  | 35                                    | 70         |
| d      | 3      | 1                                  | 40                                    | 80         |
| e      | 3      | 1                                  | 45                                    | 90         |
| f      | 3      | 1                                  | 50                                    | 90         |
